# Supplementary material for: Fabrication of UiO-66/MIL-101(Fe) binary MOF/carboxylated-GO composite for adsorptive removal of methylene blue dye from aqueous solutions
Source: Royal Society of Chemistry journal article supplement (doi:10.1039/d0ra02424d), 2020-01-01
Supplement: d0ra02424d1.pdf [file d0ra02424d1.pdf]

**Fabrication of UiO-66/MIL-101(Fe) binary MOF/Carboxylated-GO composite for  
adsorptive removal of methylene blue dye from aqueous solutions**

Abdelazeem S. Eltaweil <sup>a,\*</sup>, Eman M. Abd El-Monaem <sup>a</sup>, Gehan M. El-Subruiti <sup>a</sup>, Mona M.  
Abd El-Latif <sup>b</sup>, Ahmed M. Omer <sup>c,\*</sup>

**Supplementary data**

Table S1:  $R_L$  values for the adsorption of MB dye onto UiO-66/MIL-101(Fe)-GOCOOH  
composite Based on the Langmuir model.

| $C_o$ (mg/L) | $R_L$ |
|--------------|-------|
| 50           | 0.11  |
| 100          | 0.06  |
| 150          | 0.04  |
| 200          | 0.03  |
| 300          | 0.02  |

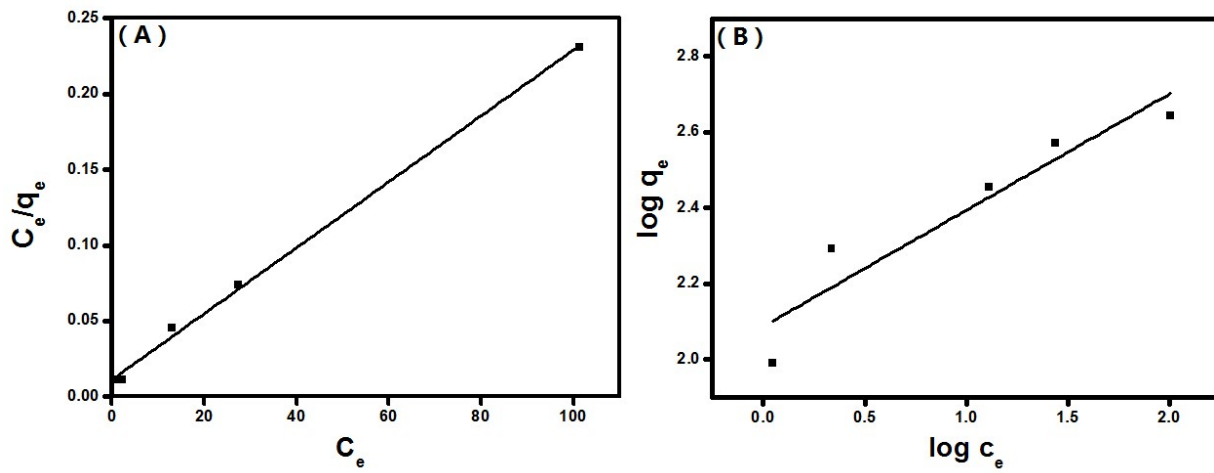

Fig. S1. Adsorption isotherm model (A) Langmuir and (B) Freundlich for the adsorption of MB dye onto UiO-66/MIL-101(Fe)-GOCOOH composite.

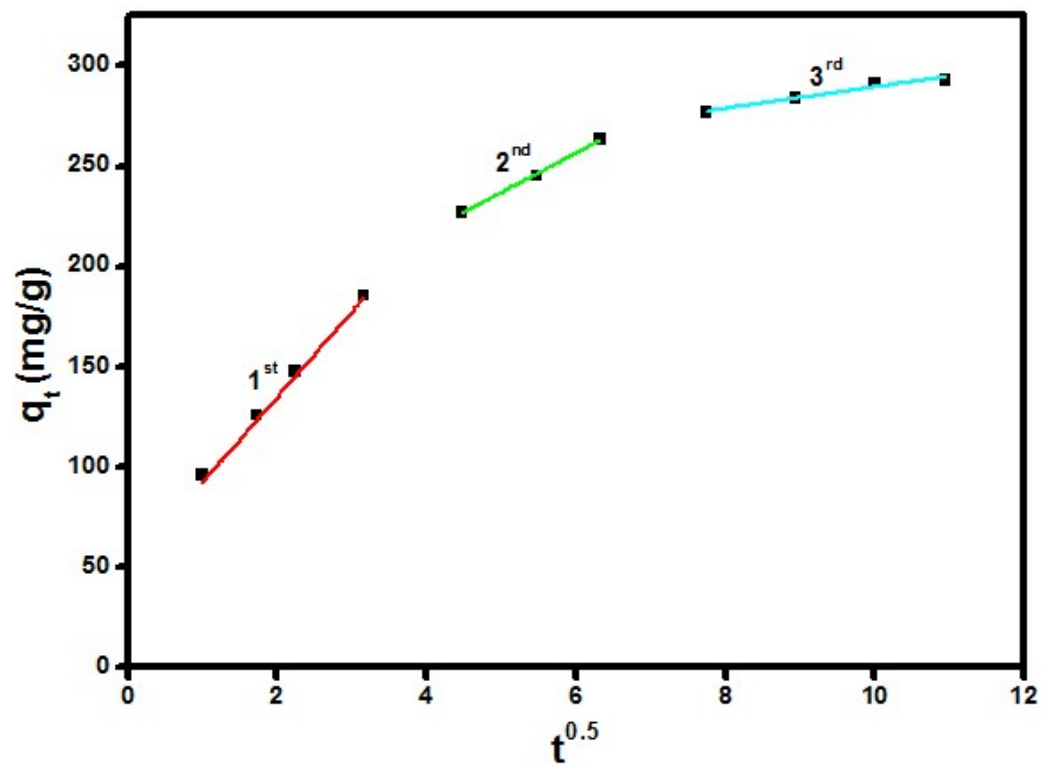

Fig. S2. intra-particle diffusion model for adsorption of MB dye onto UiO-66/MIL-101(Fe)-GOCOOH composite.
